# Supplementary material
Source: PubMed Central journal article supplement (PMC4701541)
Supplement: JCI82534.sd.pdf [file JCI82534.sd.pdf]

**A**

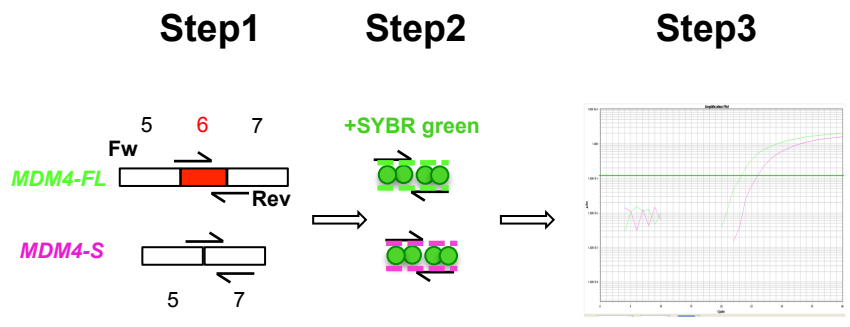

**B**

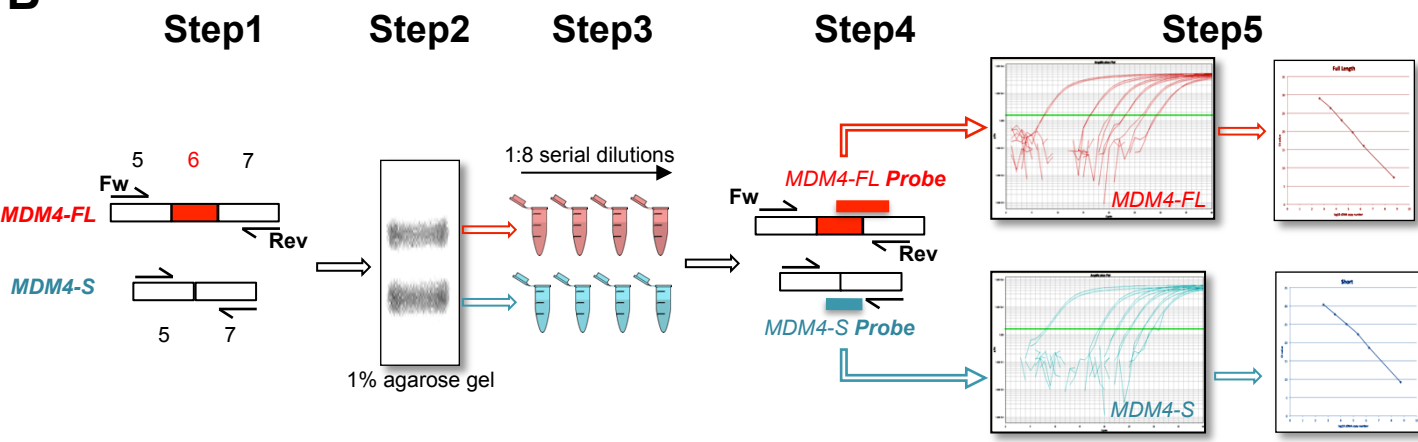

**C**

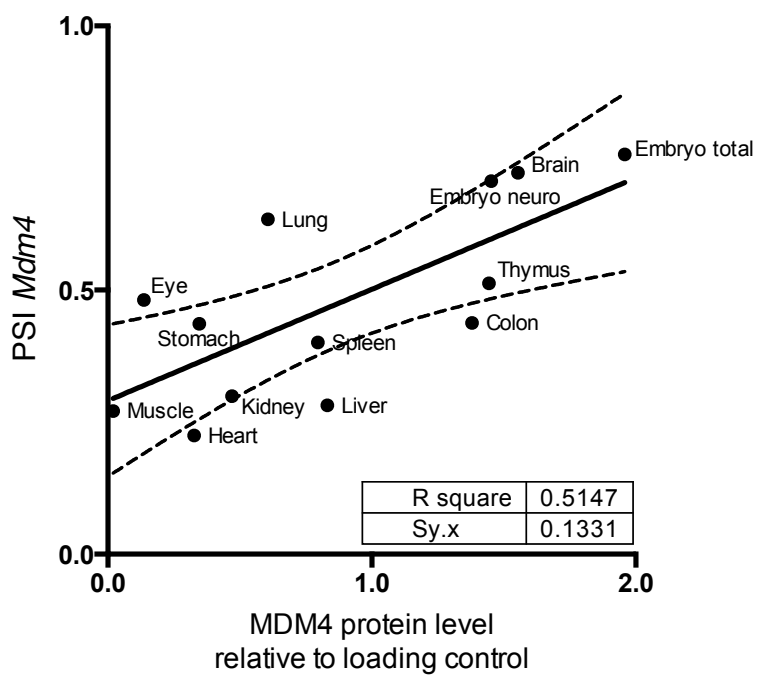

# Supplementary Figure 2

## A

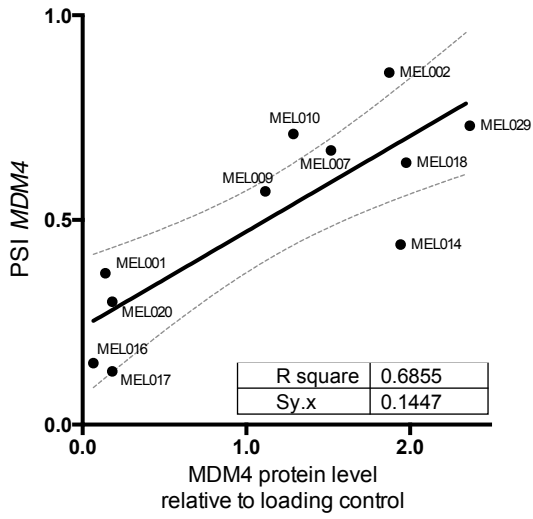

## B

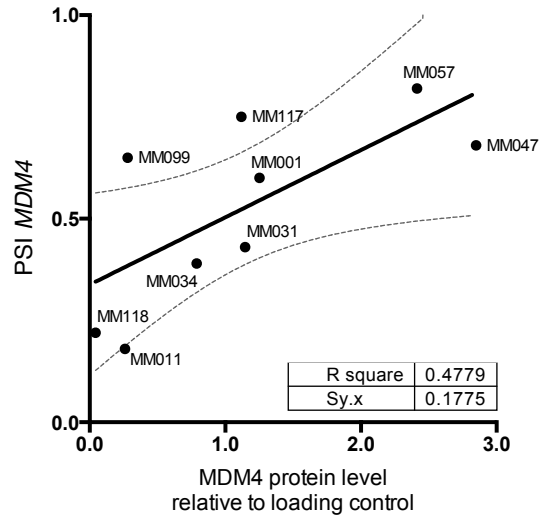

**A**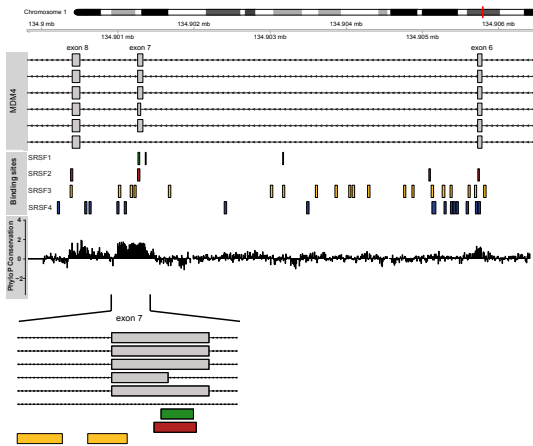**B****Supplementary Figure 3**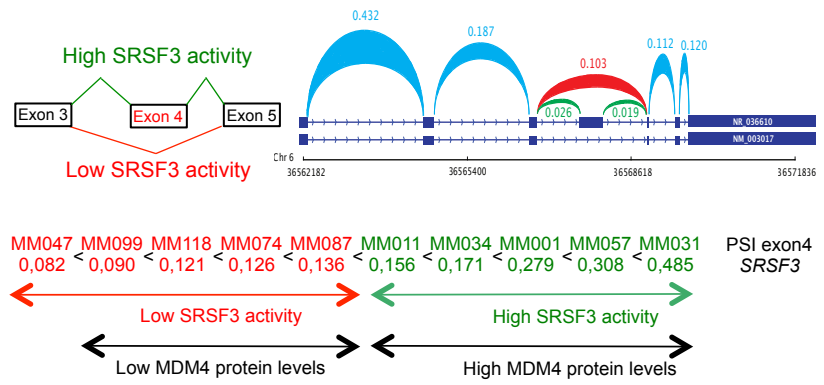**C**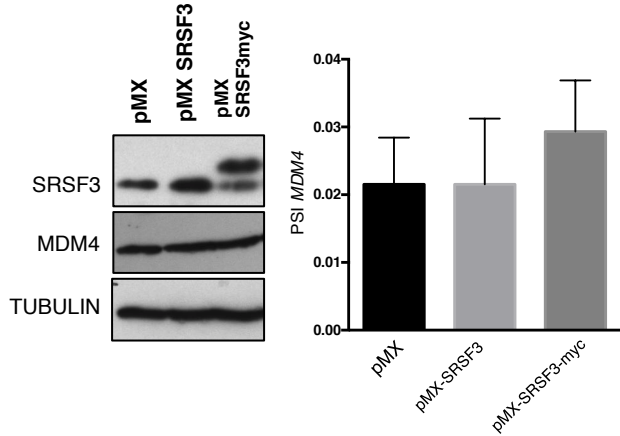**D**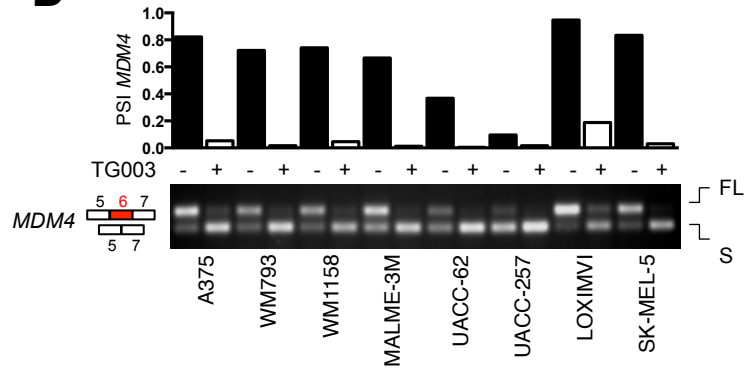**E**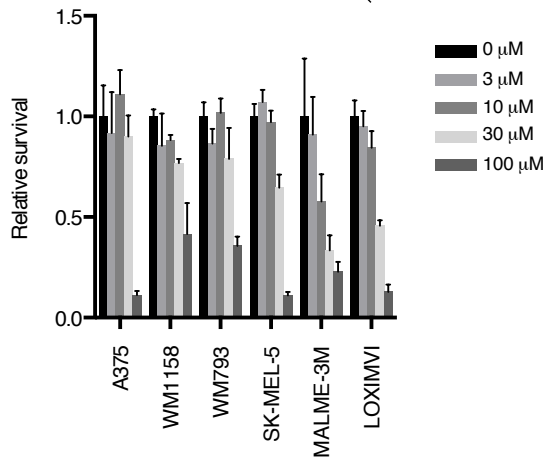**F**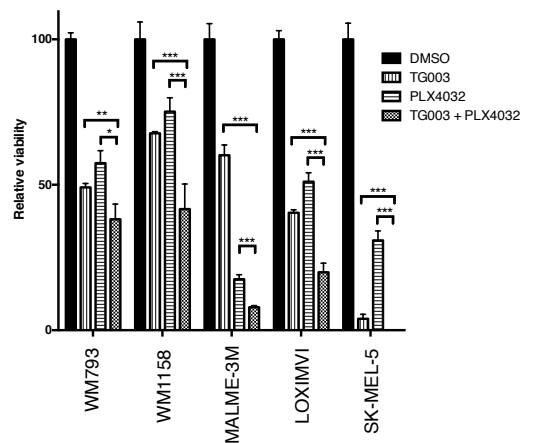**G**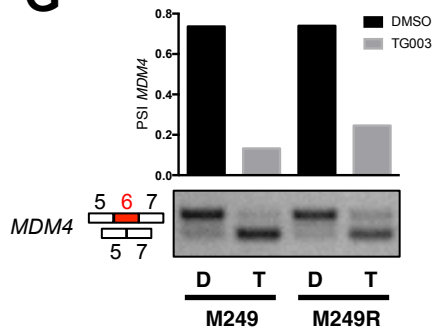**H**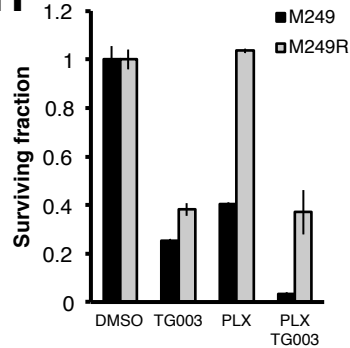**I**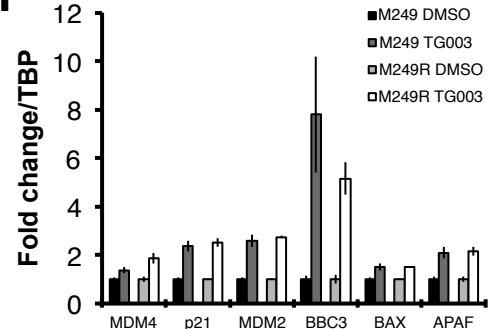

# Supplementary Figure 4

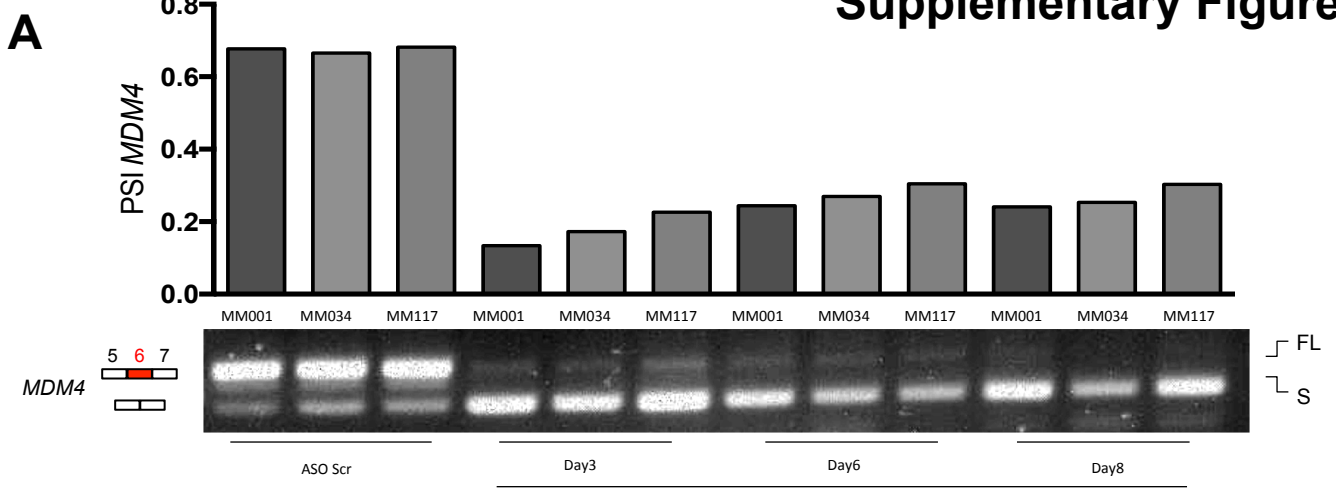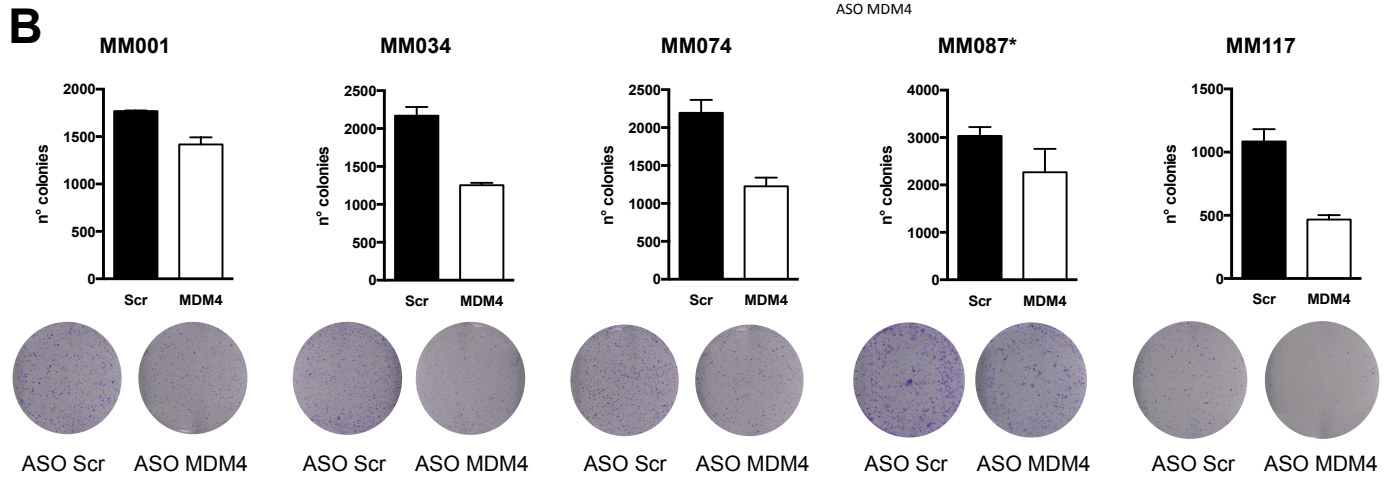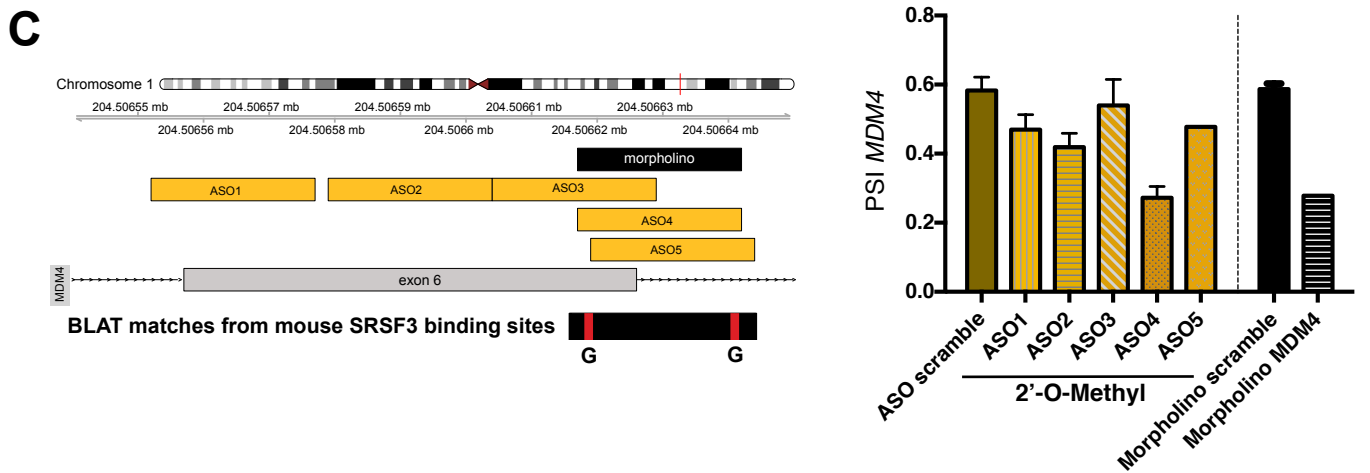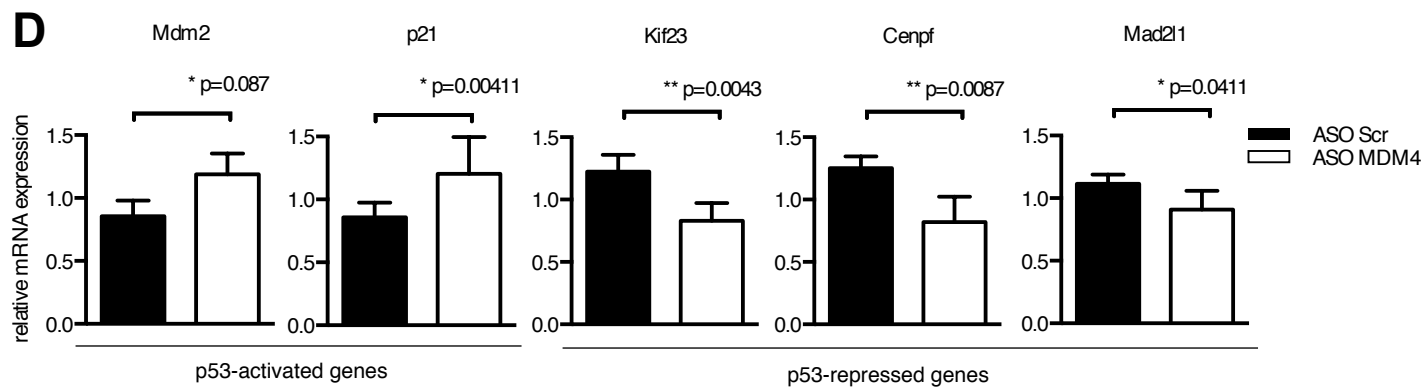

# Supplementary Figure 5

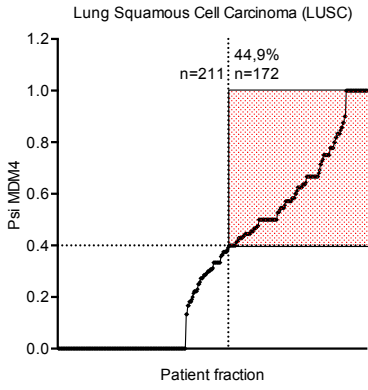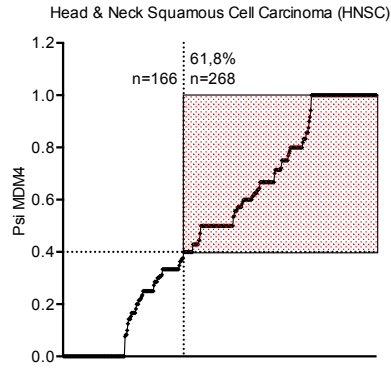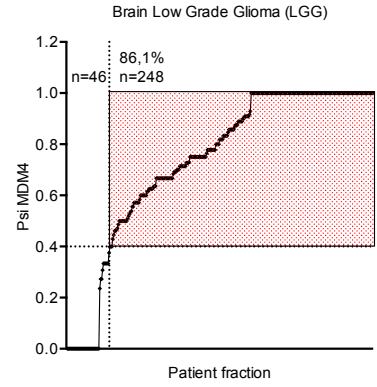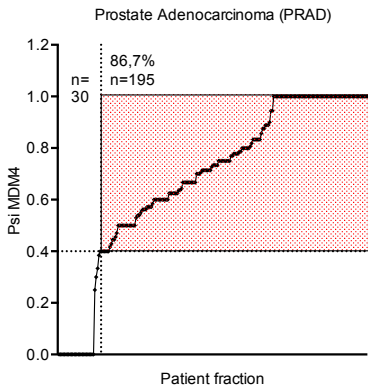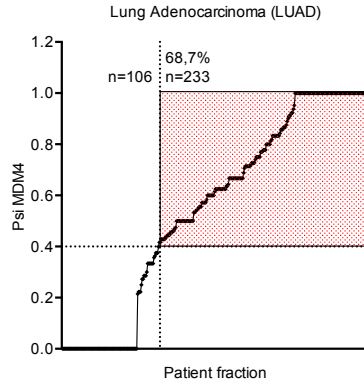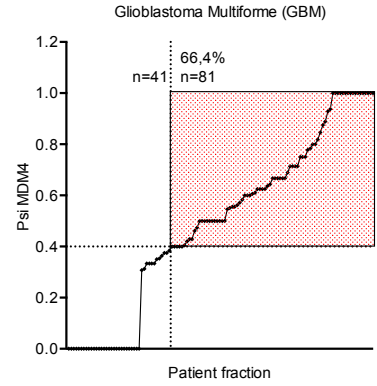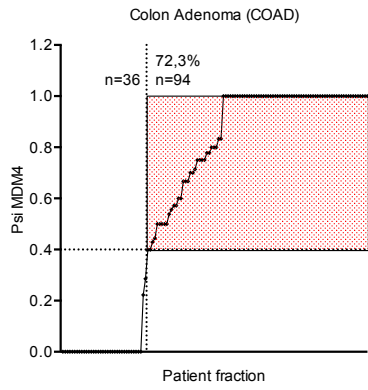

# Supplementary Figure 6

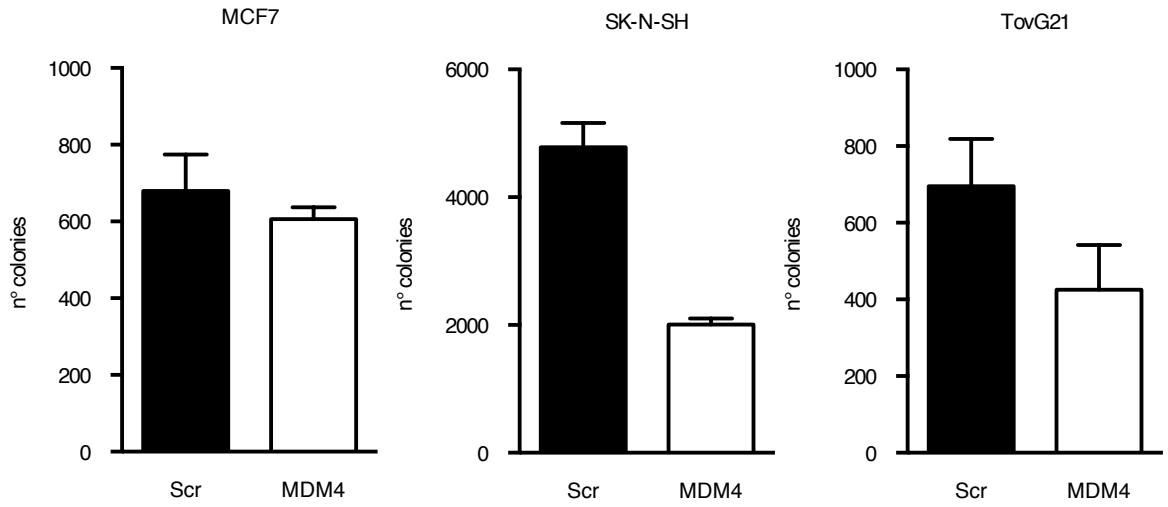

**Supplementary Table ST1. PDX xenopatient information**

| <b>Xenopatient</b>              | <b>MEL002</b>             | <b>MEL006</b>                              | <b>MEL010</b>                  | <b>BCL13</b>                                          |
|---------------------------------|---------------------------|--------------------------------------------|--------------------------------|-------------------------------------------------------|
| <b>Gender</b>                   | Female                    | Female                                     | Female                         | Male                                                  |
| <b>Year of birth</b>            | 1931                      | 1947                                       | 1955                           | 1962                                                  |
| <b>Melanoma Stage</b>           | In transit metastasis     | In transit metastasis                      | Lymph node                     | n.a.                                                  |
| <b>Biopt location</b>           | Upper leg                 | Arm                                        | Chest                          | Pleural effusion                                      |
| <b>Treatment prior to biopt</b> | Dacarbazine               | Surgery, ipilimumab, dabrafenib-trametinib | Surgery, dabrafenib-trametinib | CHOP, RICE, intrathecal methotrexate/cytarabine, DHAP |
| <b>BRAF V600 status</b>         | WT                        | V600E                                      | V600E                          | -                                                     |
| <b>NRAS Q61 status</b>          | WT                        | WT                                         | WT                             | -                                                     |
| <b>p53 status</b>               | WT (SNP c.215C>G; p.P72R) | WT (SNP c.215C>G; p.P72R)                  | WT (SNP c.215C>G;p.P72R)       | HET (c.907G>G/C (WT/missense))                        |

**Supplementary Table ST2. Antibodies**

| <b>Protein</b>   | <b>Reactive species</b> | <b>Company</b>                          | <b>Clone/Catalog number</b>      | <b>Working concentration</b> |
|------------------|-------------------------|-----------------------------------------|----------------------------------|------------------------------|
| <b>MDM4</b>      | Human                   | Millipore                               | 8C6                              | 1:1000                       |
| <b>MDM4</b>      | Mouse                   | Sigma-Aldrich                           | MDMX-82                          | 1:1000                       |
| <b>MDM2</b>      | Human                   | Homemade mAb + Santa Cruz Biotechnology | 4B2 (Homemade) and SMP14, sc-965 | 1:1000                       |
| <b>p53</b>       | Human                   | Santa Cruz Biotechnology                | DO-1, sc-126                     | 1:5000                       |
| <b>p21</b>       | Human                   | Santa Cruz Biotechnology                | F-5, sc-6246                     | 1/500                        |
| <b>SRSF3</b>     | Human                   | Abcam                                   | Ab125124                         | 1/500                        |
| <b>Actin</b>     | Human/Mouse             | Sigma-Aldrich/Santa Cruz Biotechnology  | A2066/C4                         | 1:10000/1:1000               |
| <b>b-Tubulin</b> | Human                   | Sigma-Aldrich                           | T5168                            | 1:10000                      |
| <b>GAPDH</b>     | Human/Mouse             | Abcam                                   | Ab9485                           | 1:1000                       |



Supplementary Table ST3. Primers

| SybrGreen-based RT-qPCR |                          |                           |                        |
|-------------------------|--------------------------|---------------------------|------------------------|
| Gene                    | Forward                  | Reverse                   |                        |
| Human                   | <i>Total MDM4</i>        | AGGTGCGCAAGGTGAAATGT      | CCATATGCTGCTCCTGCTGAT  |
|                         | <i>MDM4-FL</i>           | GATGCTGCTCAGACTCTCGC      | TGCACTTTGCTTCAGTTGGTC  |
|                         | <i>MDM4-S</i>            | GCCACTGCTACTACAGCAAAG     | TCTGAGGTAGGCAGTGTGGG   |
|                         | <i>MDM2</i>              | AGGAGATTTGTTTGGCGTGC      | TGAGTCCGATGATTCCTGCTG  |
|                         | <i>p21</i>               | GGCCTGGACTGTTTTCTCTCG     | GAGAAACGGGAACCAGGACAC  |
|                         | <i>BBC3</i>              | GACCTCAACGCACAGTA         | CTAATTGGGCTCCATCT      |
|                         | <i>SRSF1</i>             | TGGTTGTCTCTGGACTGCCT      | ACACCAGTGCCATCTCGGTA   |
|                         | <i>SRSF2</i>             | CGGAGCCGCAGCCCTA          | AGATCGAGAACGAGTGCCGG   |
|                         | <i>SRSF3</i>             | AGCTGATGCAGTCCGAGAG       | GGTGGGCCACGATTTCTAC    |
|                         | <i>SRSF4</i>             | TCTGAAGAACGGATATGGTTTTGTG | CTCGCTCACCACAAAGGTCT   |
|                         | <i>CENPF</i>             | CTCTCCCGTCAACAGCGTTC      | GTTGTGCATATTCTTGGCTTGC |
|                         | <i>KIF23</i>             | TGCTGCCATGAAGTCAGCGAGAG   | CCAGTGGGCGCACCCTACAG   |
|                         | <i>MAD2L1</i>            | AAGTGGTGAGGTCCTGGAAA      | TTCCAACAGTGGCAGAAATG   |
|                         | <i>TBP</i> (RefGen)      | AATCTGTGCATGCTGGTCTGCC    | AGGAGATTTGTTTGGCGTGC   |
|                         | <i>UBC</i> (RefGen)      | ATTTGGGTCGCGGTTCTTG       | TGCCTTGACATTCTCGATGGT  |
| <i>YWHAZ</i> (RefGen)   | ACTTTTGGTACATTGTGGCTTCAA | CCGCCAGGACAAACCAGTAT      |                        |
| Mouse                   | <i>total Mdm4</i>        | GACCGACTGAAGCACGGTGCAA    | ACCAAGGCAGGCCAGCAACG   |
|                         | <i>Mdm4-FL</i>           | TTCTGTGAAAGATCCAAGCCCT    | AGTCTGAGCAGCATCTGTGTTA |
|                         | <i>Mdm4-S</i>            | TGTGAAAGATCCAAGCCCTCT     | TGTTGCACCGTGCTGTGTTA   |
|                         | <i>Eif3f</i> (RefGen)    | GAACCCATTACCTCACGG        | GAGGTCAACTCCAATGCGTTC  |
|                         | <i>Heatr3</i> (RefGen)   | ACTCTTGCTCAGCACCTGTC      | TCAGGGGTCATACACTGTGG   |
|                         | <i>Psm4</i> (RefGen)     | GGAGGCAAGATGGTGTGGA       | ACAGTCATTGGCCAGTGTGA   |

| semi-qPCR |                           |                       |                        |
|-----------|---------------------------|-----------------------|------------------------|
| Gene      | Forward                   | Reverse               |                        |
| Human     | <i>MDM4</i> splice status | TGTGGTGGAGATCTTTTGGG  | GCAGTGTGGGGATATCGT     |
|           | <i>GAPDH</i>              | TGCCATGTAGACCCCTGAAG  | ATGGTACATGACAAGGTGCGG  |
| Mouse     | <i>Mdm4</i> splice status | TGTGGTGGAGATCTTTTGGG  | TCAGTTCTTTTTCTGGGATTGG |
|           | <i>Gapdh</i>              | AGGTTGTCTCCTGCGACTTCA | GGTGGTCCAGGGTTTCTTACTC |

**Supplementary Table ST4.** shRNA from MISSION pLKO1 shRNA library

| <b>TRC code</b> | <b>SHORT CODE</b> | <b>Target gene</b> |
|-----------------|-------------------|--------------------|
| TRCN0000001227  | 227               | SRSF3              |
| TRCN0000273171  | 171               | SRSF3              |
| TRCN0000273170  | 170               | SRSF3              |
| TRCN0000001224  | 224               | SRSF3              |
| TRCN0000273174  | 174               | SRSF3              |
| TRCN0000231449  | 449               | SRSF4              |
| TRCN0000231448  | 448               | SRSF4              |
| TRCN0000001095  | 95                | SRSF1              |
| TRCN0000001096  | 96                | SRSF1              |
| TRCN0000000109  | 109               | SRSF2              |
| TRCN0000000084  | 84                | SRSF2              |
| TRCN0000000140  | 140               | SRSF5              |
| TRCN0000000141  | 141               | SRSF5              |
| TRCN0000231443  | 443               | SRSF6              |
| TRCN0000006620  | 620               | SRSF6              |
| TRCN0000001142  | 142               | SRSF7              |
| TRCN0000273401  | 401               | SRSF7              |
| TRCN0000320890  | 890               | SRSF9              |
| TRCN0000320892  | 892               | SRSF9              |
| TRCN0000074835  | 835               | SRSF10             |
| TRCN0000074836  | 836               | SRSF10             |
| TRCN0000284895  | 895               | SRSF11             |
| TRCN0000314691  | 691               | SRSF11             |
| TRCN0000001309  | 309               | SRSF12             |
| TRCN0000001307  | 307               | SRSF12             |

**Supplementary Table ST5. Morpholino and ASO sequences**

|                     |                           |
|---------------------|---------------------------|
| Morpholino Scramble | CGGTGTGTGTATCATTCTCTAGTGT |
| Morpholino MDM4     | CGTGTGGTGATTTACCTTCAGTTG  |
| Scramble ASO        | TTGCACGAGTGCAAAGGTCTTCAT  |
| ASO1                | GCGAGAGTCTGAGCAGCATCTGGAT |
| ASO2                | ATATCCATACTGTGATCCTGTGCGA |
| ASO3                | TACCTTCAGTTGGTCTTGACTTGGA |
| ASO5                | ACCGTGTGGTGATTTACCTTCAGT  |
| ASO4                | CGTGTGGTGATTTACCTTCAGTTG  |

**Supplementary Table ST6. TaqMan qPCR and probes**

|                                                         |                              |
|---------------------------------------------------------|------------------------------|
| Forward primer                                          | AAGAAAGAATCTTGTCACCTTAGCC    |
| Reverse primer                                          | GGGATATCGTCTTCTGTAGTTCTT     |
| Exon 5-7 (MDM4-S) - 5' 6-FAM™ - ZEN - 3' Iowa Black® FQ | ACTGCTACTACAGCAAAGTGCAGAGG   |
| Exon 6-7 (MDM4-FL)- 5' TET™ - ZEN - 3' Iowa Black® FQ   | CACTTTGCTTCAGTTGGTCTTGACTTGG |

**Supplementary Table ST7. RIP primers**

|                                                     |                         |                         |
|-----------------------------------------------------|-------------------------|-------------------------|
| Upstream MDM4 exon 6                                | GATATGGCCTGTCTTGGTCTT   | GCCAGGTTTAGTCCCTAGAAAT  |
| Predicted SRSF3 binding site on 5'SS of MDM4 exon 6 | AGTCAAGACCAACTGAAGGTAAA | TCCAAGATCCATAGGTACAGAGA |
| SRSF3 exon 4 (positive control)                     | CGCCAACCAACTAAATCCAAC   | AAGCTAGAAATGGTGAGGTGAG  |
